# Supplementary material for: Role of Src and Cortactin in Pemphigus Skin Blistering
Source: PubMed Central journal article supplement (PMC6461052; doi:10.3389/fimmu.2019.00626), 2019-04-04
Supplement: Image_1.pdf [file Image_1.pdf]

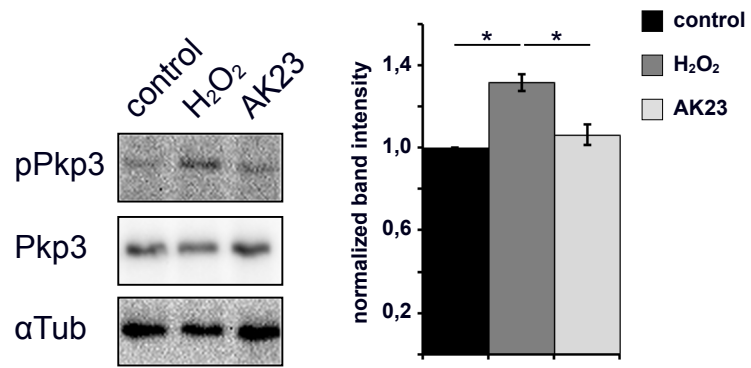

*Supplemental Figure 1: Phosphorylation of Pkp3 was absent after incubation with AK23*

Western blot analysis revealed that Pkp3 was not phosphorylated after incubation with AK23 for 2h. H<sub>2</sub>O<sub>2</sub> served as positive control (n=4).
